# Supplementary material for: The miR-19a/Cylindromatosis Axis Regulates Pituitary Adenoma Bone Invasion by Promoting Osteoclast Differentiation
Source: MDPI journal article supplement (doi:10.3390/cancers16020302), 2024-01-11
Supplement: s1 [file s1]

**Supplementary table 1. Clinical information for specimens.**

| Name | Patient ID | Gender | Age | Operation Date | Diagnostics | Knosp Grade | Bone Invasion     |
|------|------------|--------|-----|----------------|-------------|-------------|-------------------|
| XXX  | XXX        | Male   | 46  | 2022/11/14     | GH-PA       | IIIB        | Bone Invasive     |
| XXX  | XXX        | Male   | 52  | 2022/11/25     | GH-PA       | IV          | Bone Invasive     |
| XXX  | XXX        | Male   | 41  | 2022/12/3      | GH-PA       | IV          | Bone Invasive     |
| XXX  | XXX        | Female | 45  | 2022/12/24     | GH-PA       | IV          | Bone Invasive     |
| XXX  | XXX        | Male   | 67  | 2022/12/28     | GH-PA       | IV          | Bone Invasive     |
| XXX  | XXX        | Male   | 34  | 2023/1/24      | GH-PA       | IIIB        | Bone Invasive     |
| XXX  | XXX        | Male   | 51  | 2023/1/27      | GH-PA       | IV          | Bone Invasive     |
| XXX  | XXX        | Female | 57  | 2023/2/1       | GH-PA       | IV          | Bone Invasive     |
| XXX  | XXX        | Male   | 49  | 2023/2/11      | GH-PA       | IV          | Bone Invasive     |
| XXX  | XXX        | Male   | 55  | 2023/2/20      | GH-PA       | IIIB        | Bone Invasive     |
| XXX  | XXX        | Male   | 60  | 2022/11/16     | GH-PA       | IV          | non-Bone Invasive |
| XXX  | XXX        | Male   | 49  | 2022/12/5      | GH-PA       | IIIB        | non-Bone Invasive |
| XXX  | XXX        | Female | 57  | 2022/12/14     | GH-PA       | IV          | non-Bone Invasive |
| XXX  | XXX        | Female | 37  | 2023/1/3       | GH-PA       | IIIA        | non-Bone Invasive |
| XXX  | XXX        | Male   | 49  | 2023/1/5       | GH-PA       | IIIA        | non-Bone Invasive |
| XXX  | XXX        | Male   | 41  | 2023/1/17      | GH-PA       | IV          | non-Bone Invasive |
| XXX  | XXX        | Male   | 47  | 2023/1/20      | GH-PA       | IIIA        | non-Bone Invasive |
| XXX  | XXX        | Male   | 58  | 2023/2/2       | GH-PA       | IV          | non-Bone Invasive |
| XXX  | XXX        | Female | 53  | 2023/2/11      | GH-PA       | II          | non-Bone Invasive |
| XXX  | XXX        | Male   | 59  | 2023/2/21      | GH-PA       | IV          | non-Bone Invasive |
