# Supplementary figures and images for: The miR-19a/Cylindromatosis Axis Regulates Pituitary Adenoma Bone Invasion by Promoting Osteoclast Differentiation
Source: MDPI journal article supplement (doi:10.3390/cancers16020302), 2024-01-11

Figure2 F

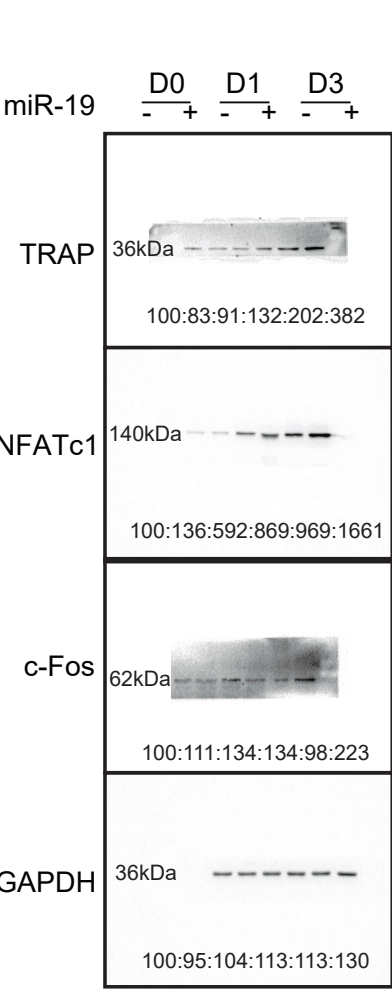

Figure3 C

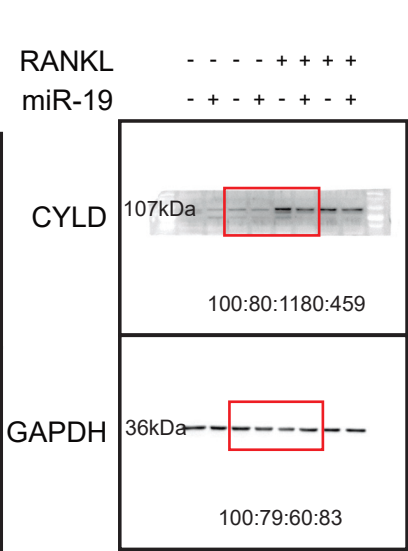

Figure3 F

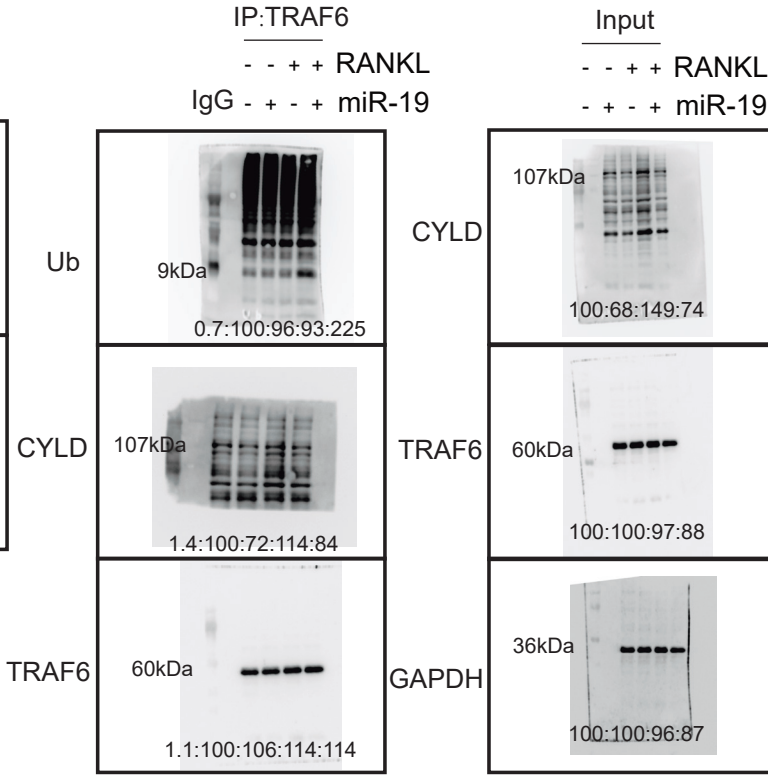

Figure5 B

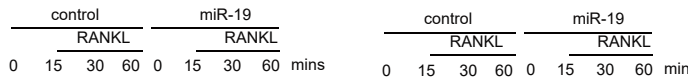

Figure4 A

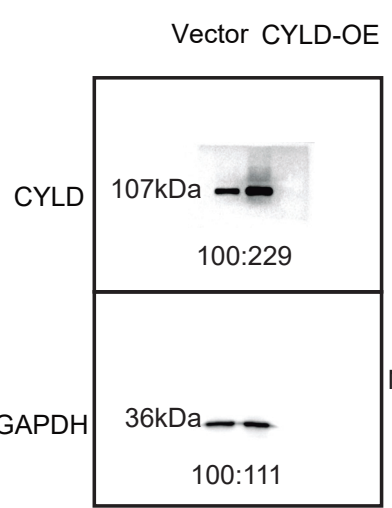

Figure5 A

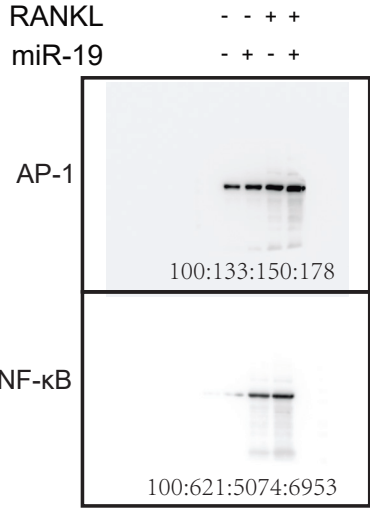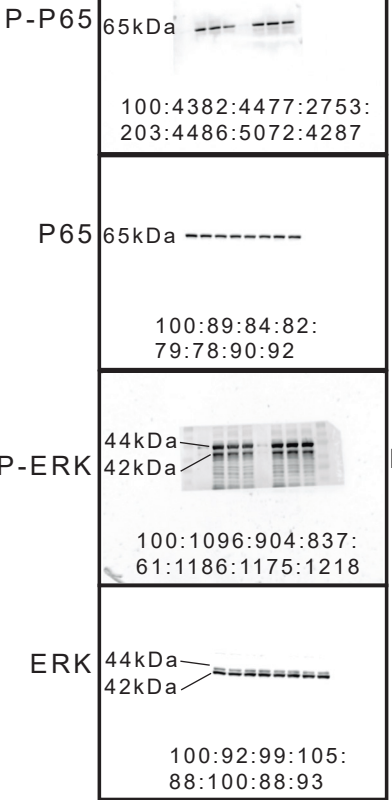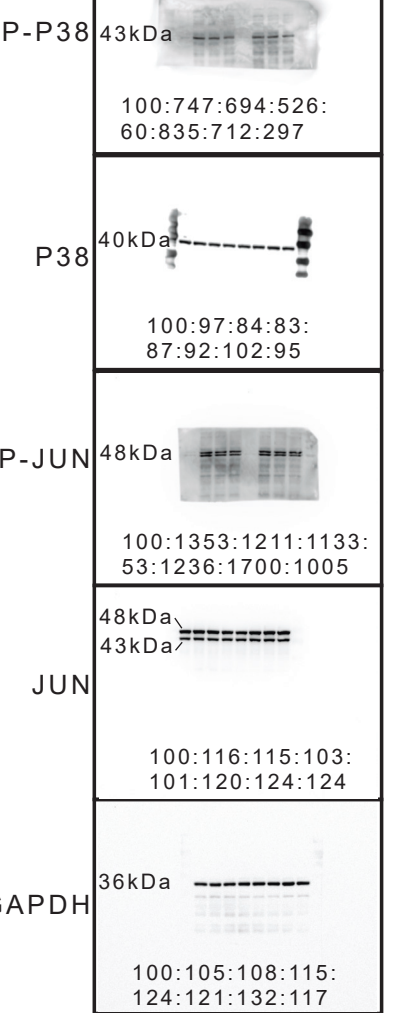

Supplement: s1 [file s1]
